# Supplementary material
Source: Copernicus journal article supplement (doi:10.5194/egusphere-2026-3770)
Supplement: Supplementary file 1 [file egusphere-2026-3770-supplement.pdf]

# Regime-dependent reversal in temporal asymmetry of ecosystem carbon exchange across global biomes

Nikhila Gollakota<sup>a</sup>, Georgianne Moore<sup>b</sup>, Heng Huang<sup>a</sup>, Lamberto Rondoni<sup>c,d</sup>, Binayak Mohanty<sup>a</sup>, & Salvatore Calabrese<sup>a,\*</sup>

a: Department of Biological and Agricultural Engineering, Texas A&M University, College Station, 77843, TX, USA

b: Department of Biology, Georgia Southern University, 4324 Old Register Road, Statesboro, 30460, GA, USA

c: Dipartimento di Scienze Matematiche, Politecnico di Torino, Corso Duca Degli Abruzzi 24, 10129 Torino, Italy

d: INFN, Sezione di Torino, Via Pietro Giuria 1, 10125 Torino, Italy ORCID: 0000-0002-4223-6279

## Supplementary information

This supplementary information document consists of additional tables and figures that support the main findings of our manuscript. The document provides details of site characteristics of all the 13 study sites in Table S1, description of the FLUXNET variables used in our study Table S2, details of the key variables used in the NEP asymmetry analysis in Table S3, a step-by-step methodology of NEP asymmetry calculation is described in Table S4, a quality control analysis assessing the proportion of gap-filled data within the identified extreme events in Table S5, and Table S6 and S7 summarize the best fit relationships for all variables and the statistical metrics for all fits for all fluctuations and extreme fluctuations respectively. It also includes illustrations of Net Ecosystem Productivity (NEP) time series (Figure S1), site-specific fluctuation paths and asymmetry coefficients (Figures S2–S5), the robustness of the asymmetry metric to varying extreme thresholds (Figures S6), and the relationships between asymmetry and potential environmental drivers across different ecosystems (Figures S7–S17).

### 1. Examples of NEP Time-Series

Figure S1: Single panels showing the timeseries of Broadleaf Forest, Woody Savanna, Open Shrubland, and Grassland

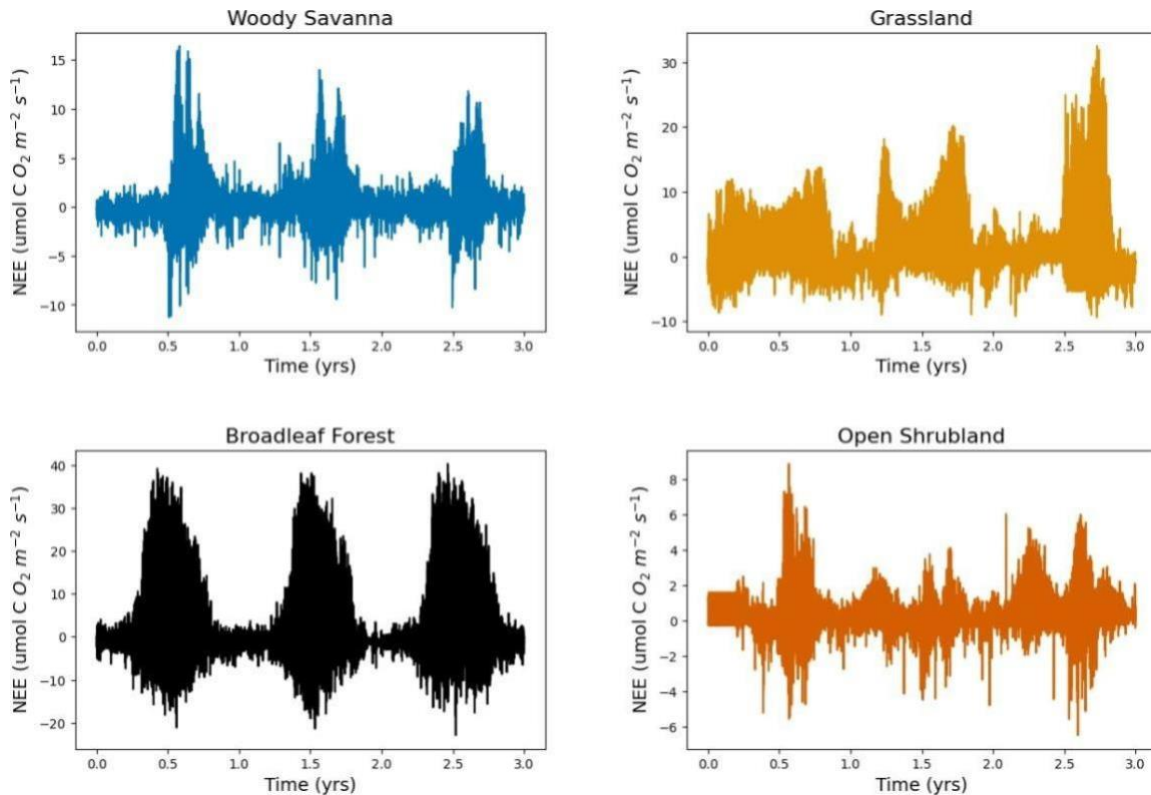

## 2. Analysis of Fluctuation Paths

Figure S2: Top 1% fluctuation paths (light gray) and their average (thick dark gray) for all sites

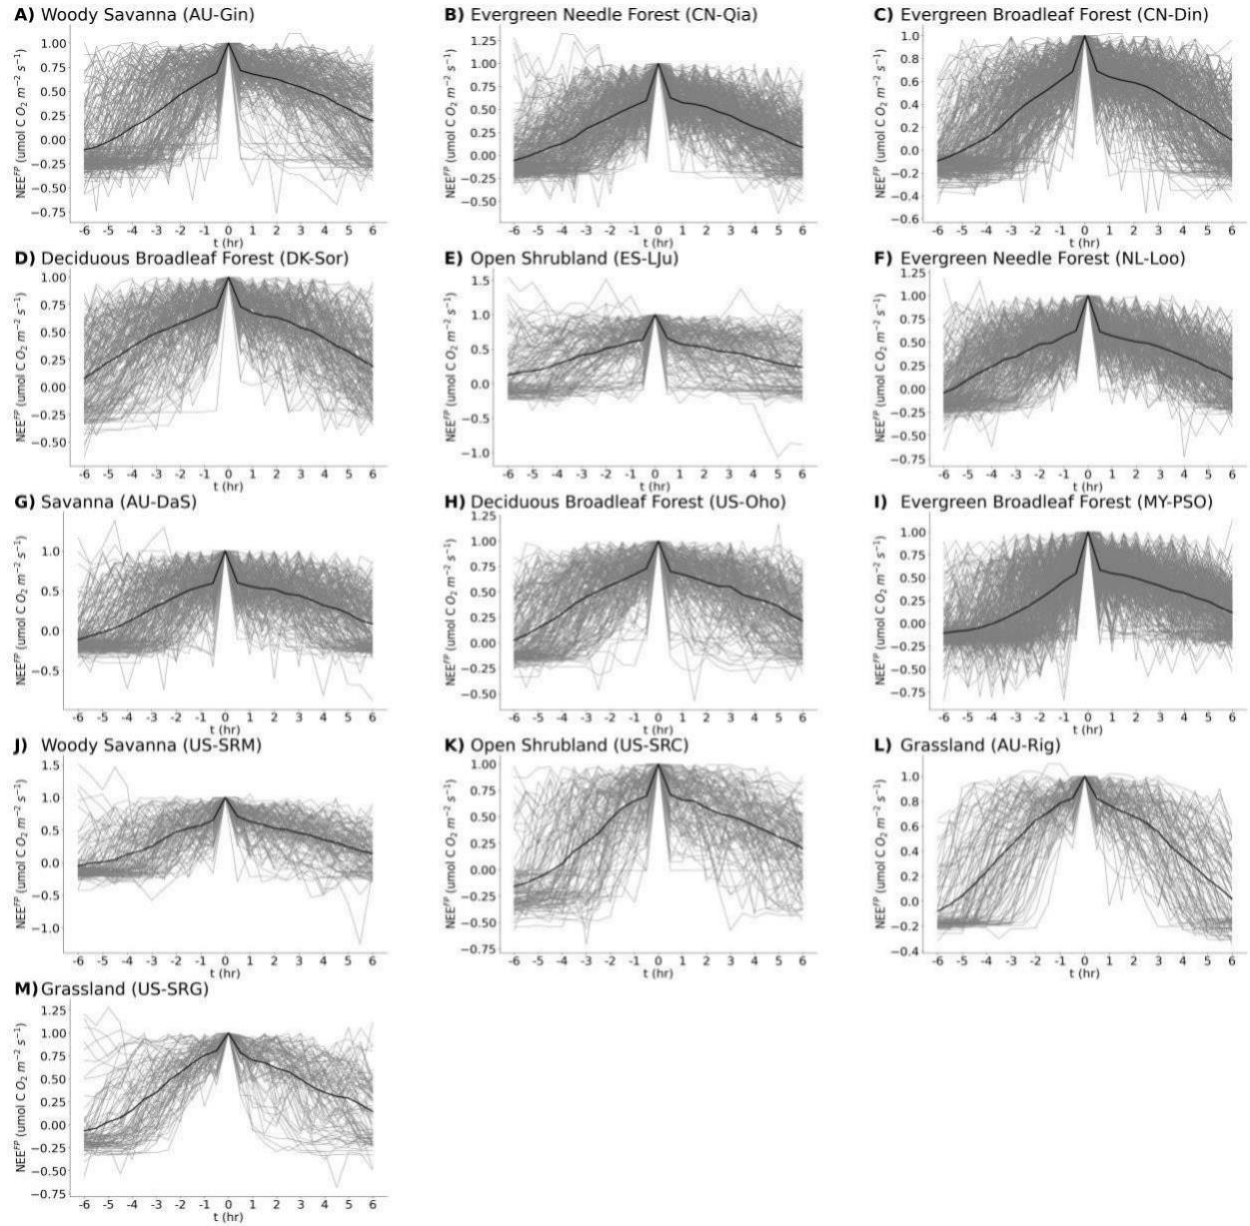

Figure S3: Fluctuation paths (light gray) and their average (thick dark gray) for all fluctuations ( $c=0$ ) for all sites

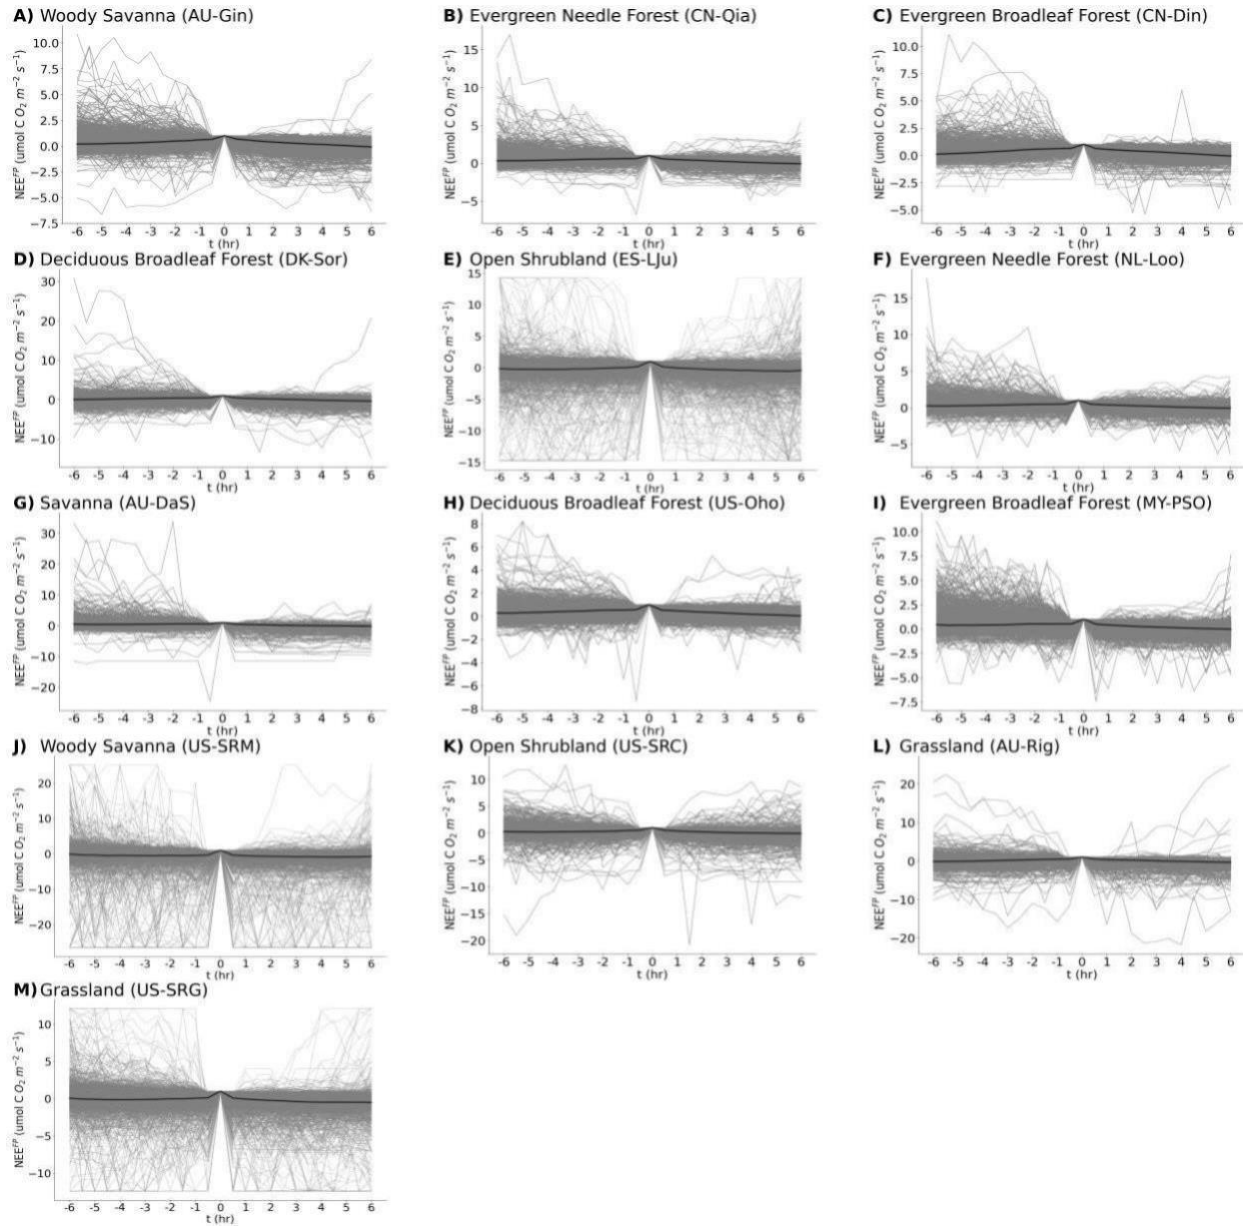

### 3. Analysis of Asymmetry Coefficient

Figure S4: Asymmetry Coefficients (light gray) and their average (thick dark gray) for top 1% fluctuations for all sites

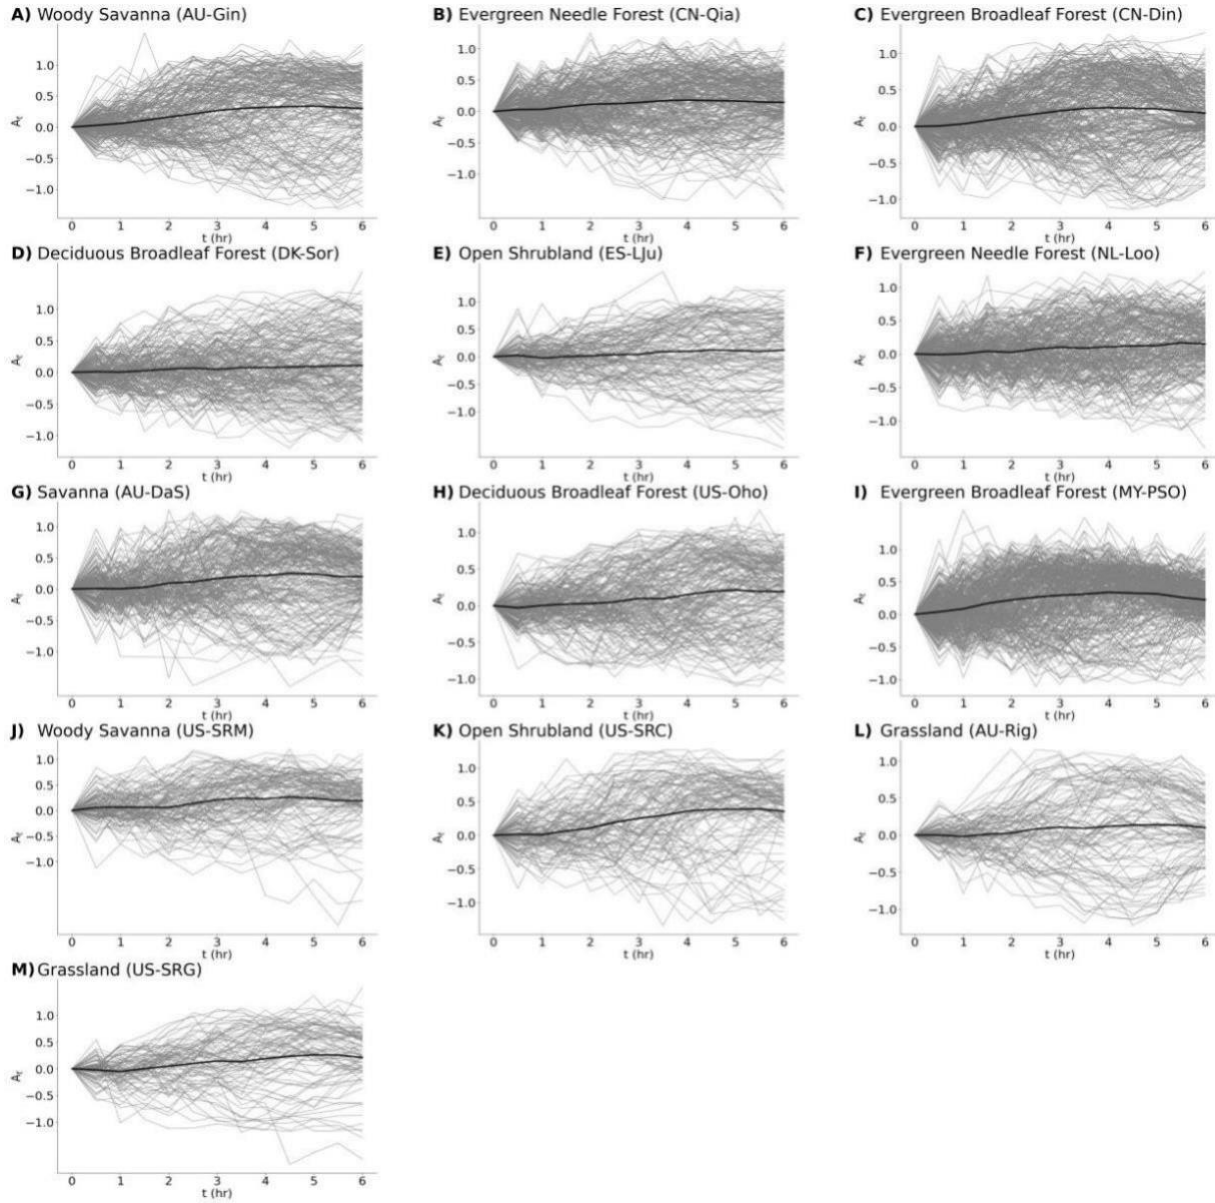

Figure S5: Asymmetry Coefficients (light gray) and their average (thick dark gray) for all fluctuations ( $c=0$ ) for all sites

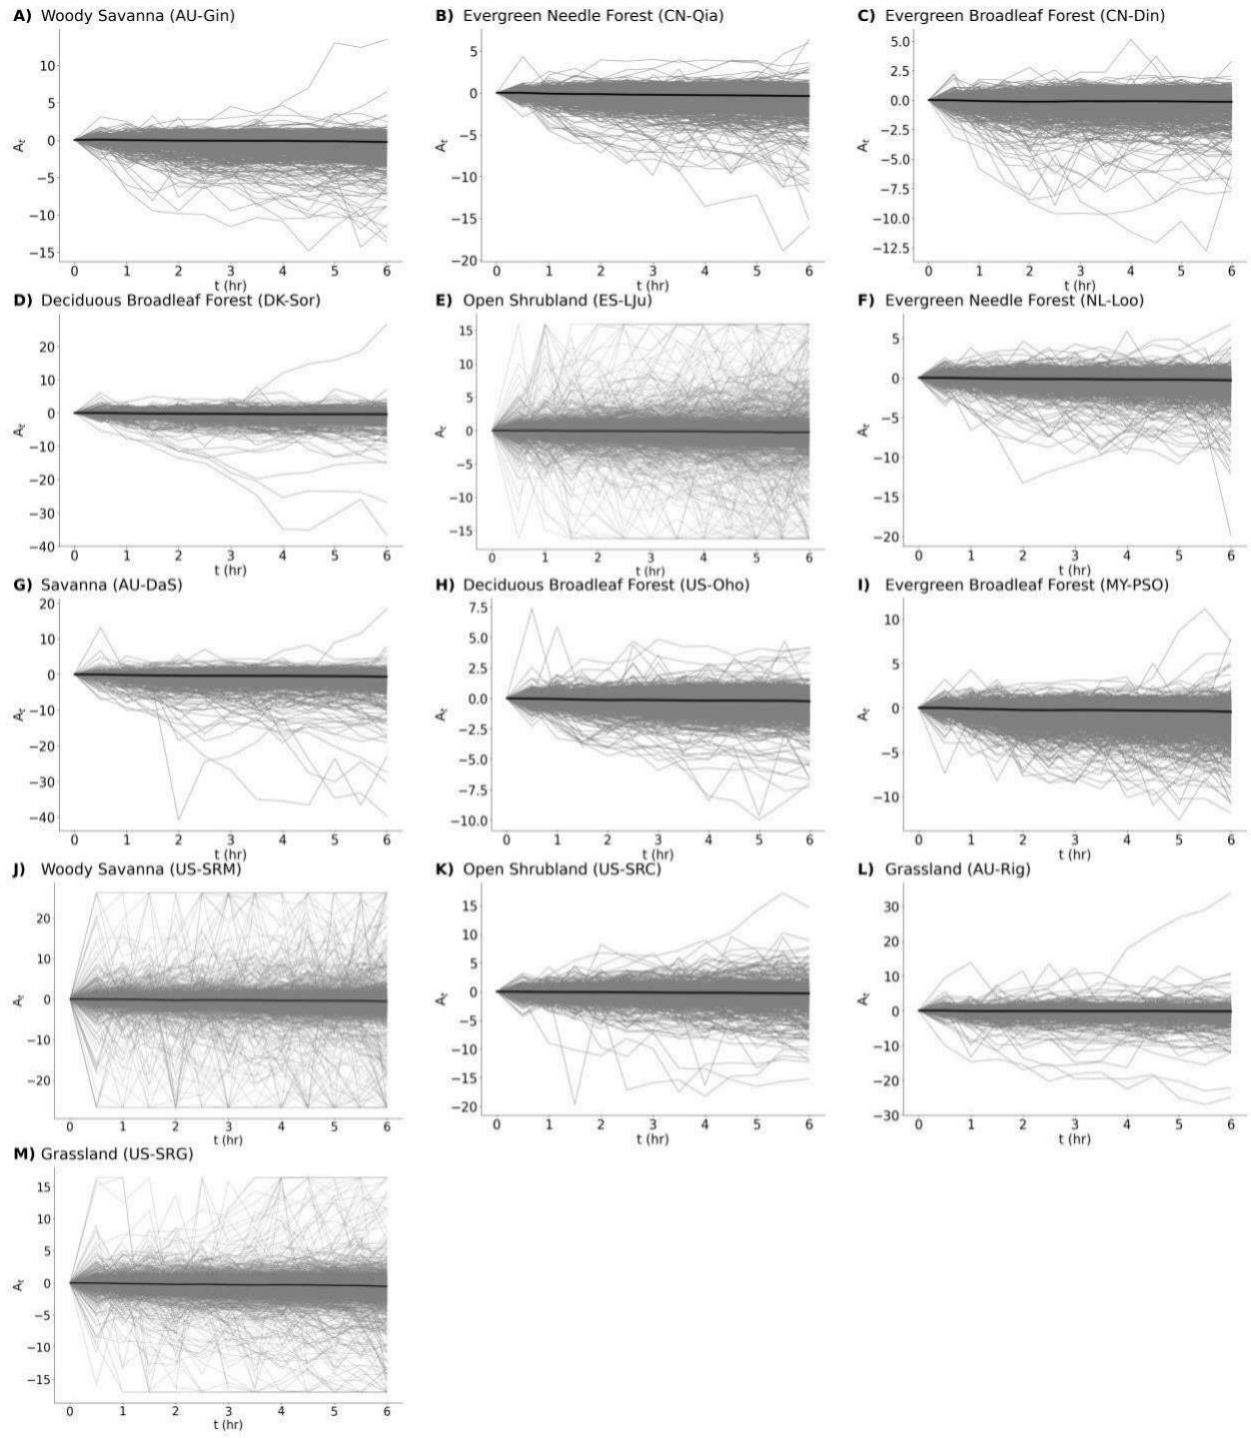

#### 4. Sensitivity of Asymmetry to Threshold Selection

Figure S6: Sensitivity of the average asymmetry coefficient across all 13 sites evaluated at three extreme fluctuation thresholds: top 1% (99th quantile), top 2% (98th quantile), and top 5% (95th quantile)

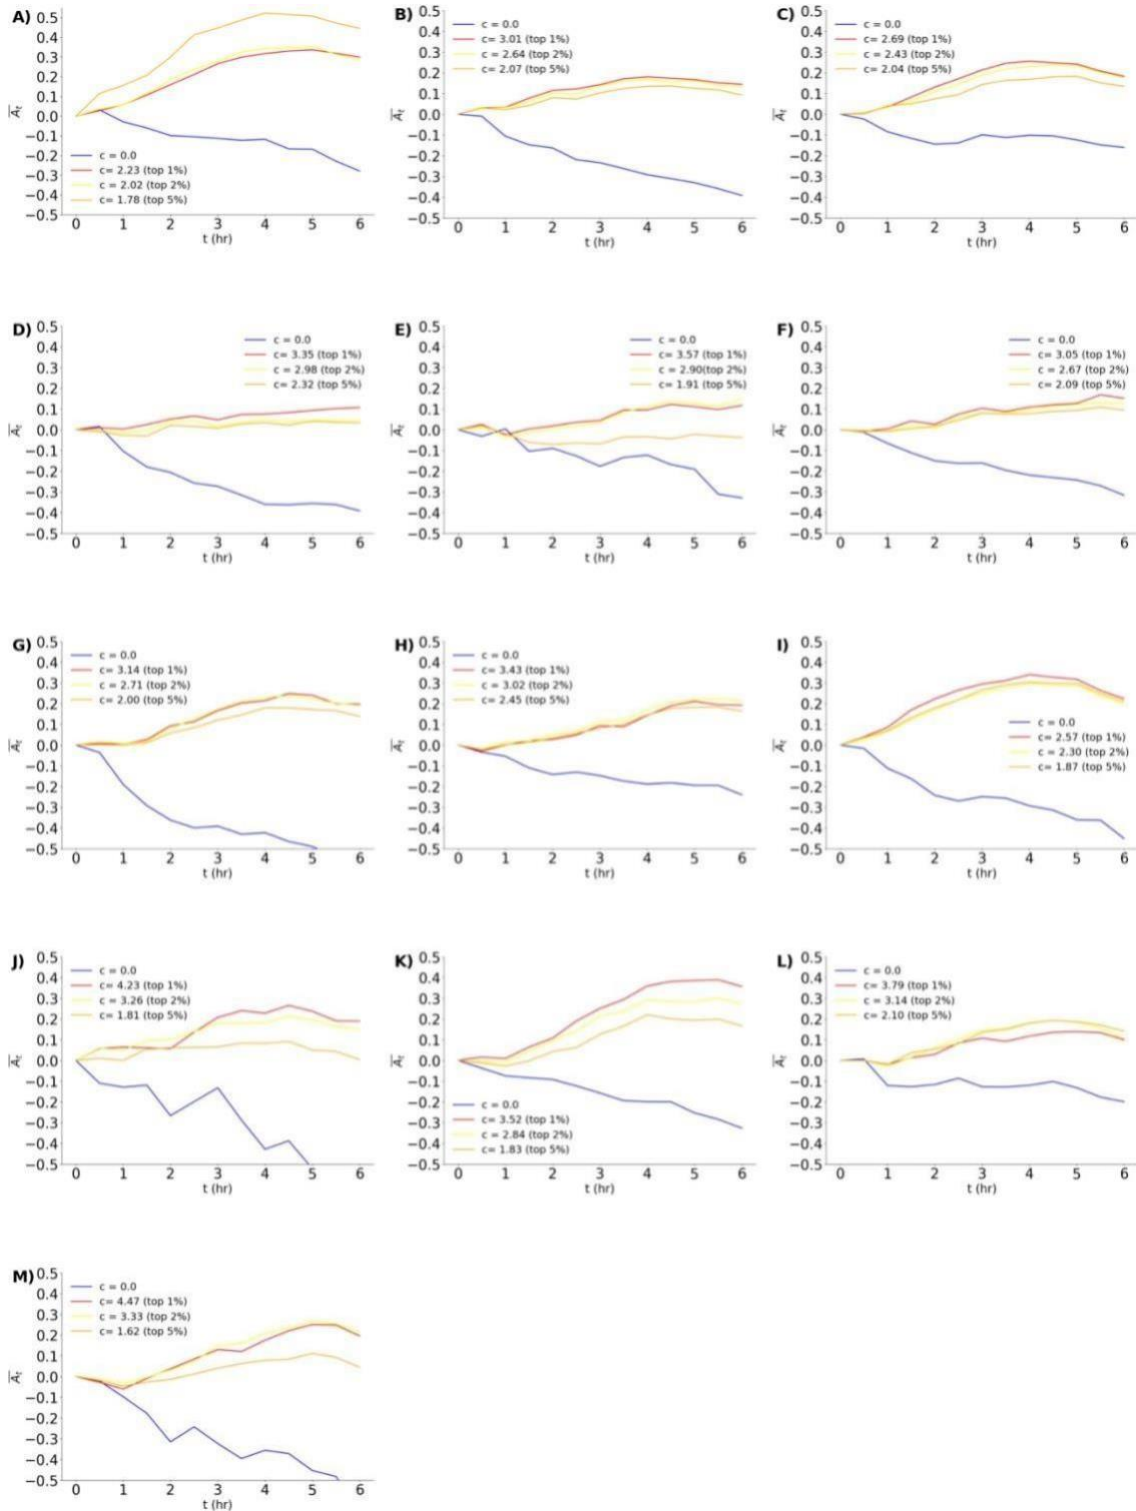

## 5. Analysis of potential drivers of asymmetry for top 1% fluctuations (extremes)

Figure S7: Relationship between average NEP asymmetry and 3yr shortwave radiation average, and daily average shortwave radiation for top 1% fluctuations for all sites

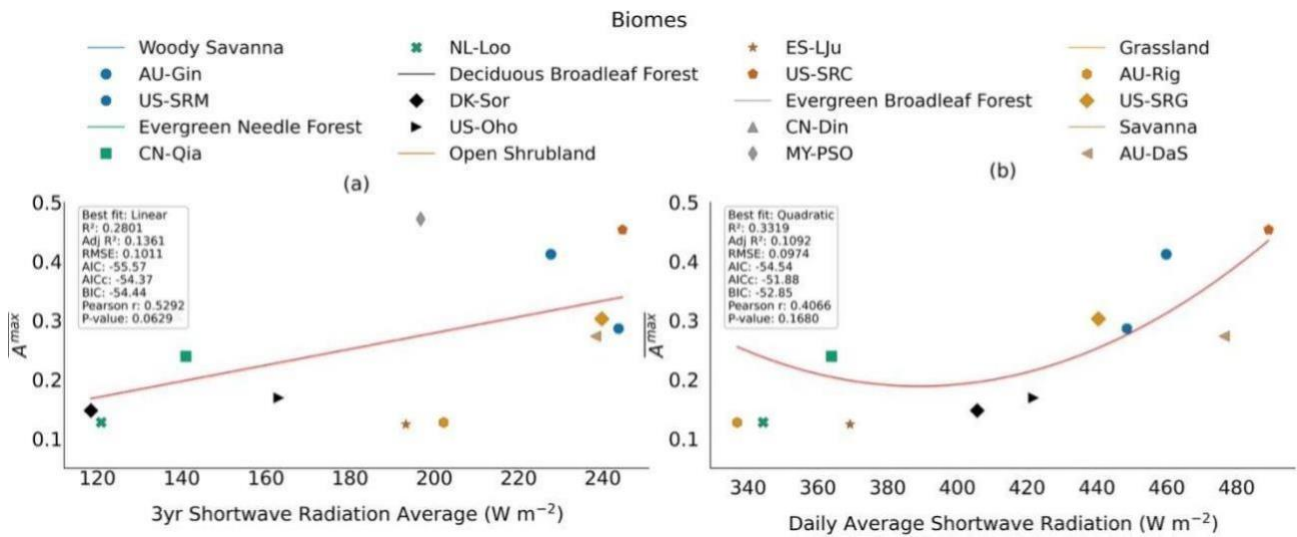

Figure S8: Relationship between average NEP asymmetry and 3yr soil moisture average, and daily average soil moisture for top 1% fluctuations for all sites

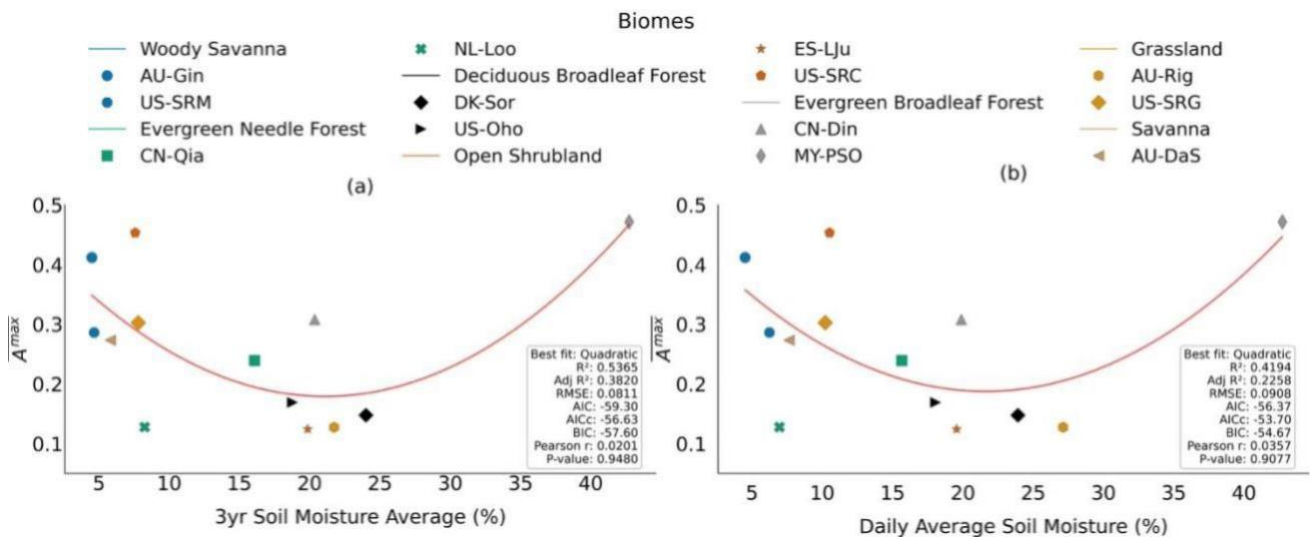

Figure S9: Relationship between average NEP asymmetry and 3yr precipitation average, and daily average precipitation for top 1% fluctuations for all sites

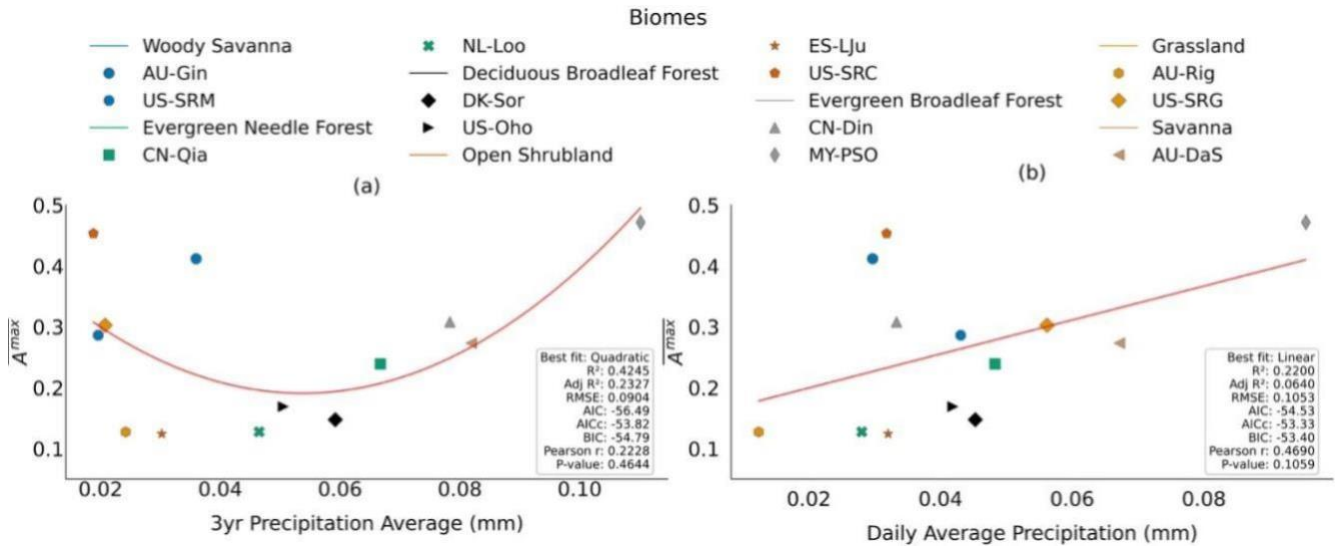

Figure S10: Relationship between average NEP asymmetry and 3yr vapor pressure deficit average, and daily average vapor pressure deficit for top 1% fluctuations for all sites

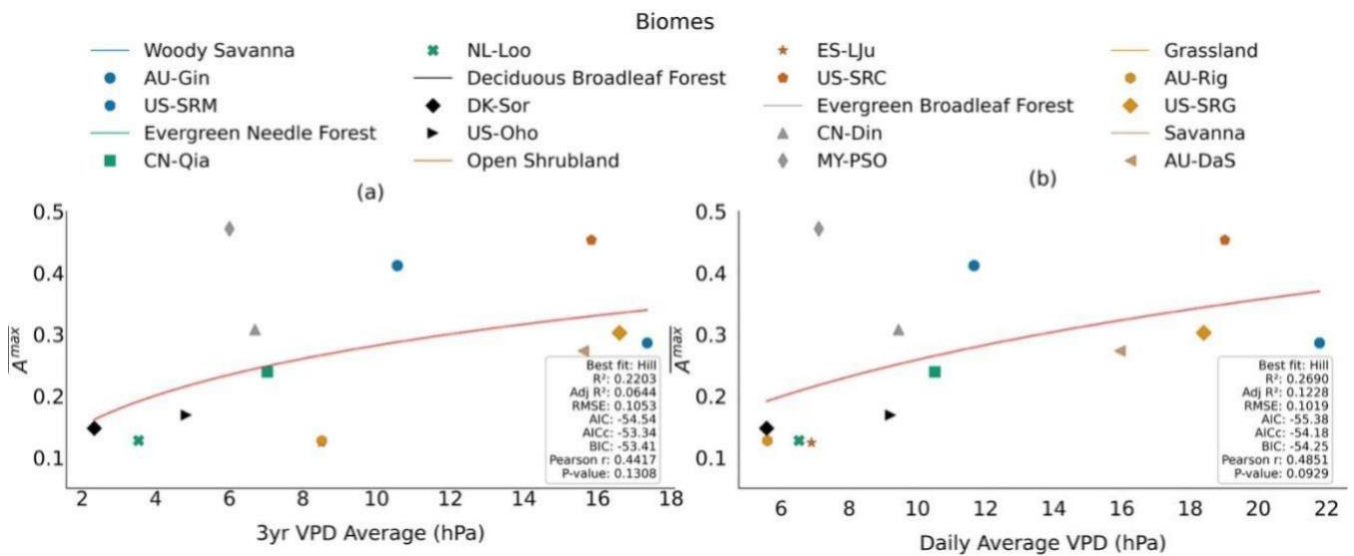

Figure S11: Relationship between average NEP asymmetry and 3yr Mean Annual Temperature: 3yr Mean Annual Precipitation and daily Mean Annual Temperature: daily Mean Annual Precipitation for top 1% fluctuations for all sites

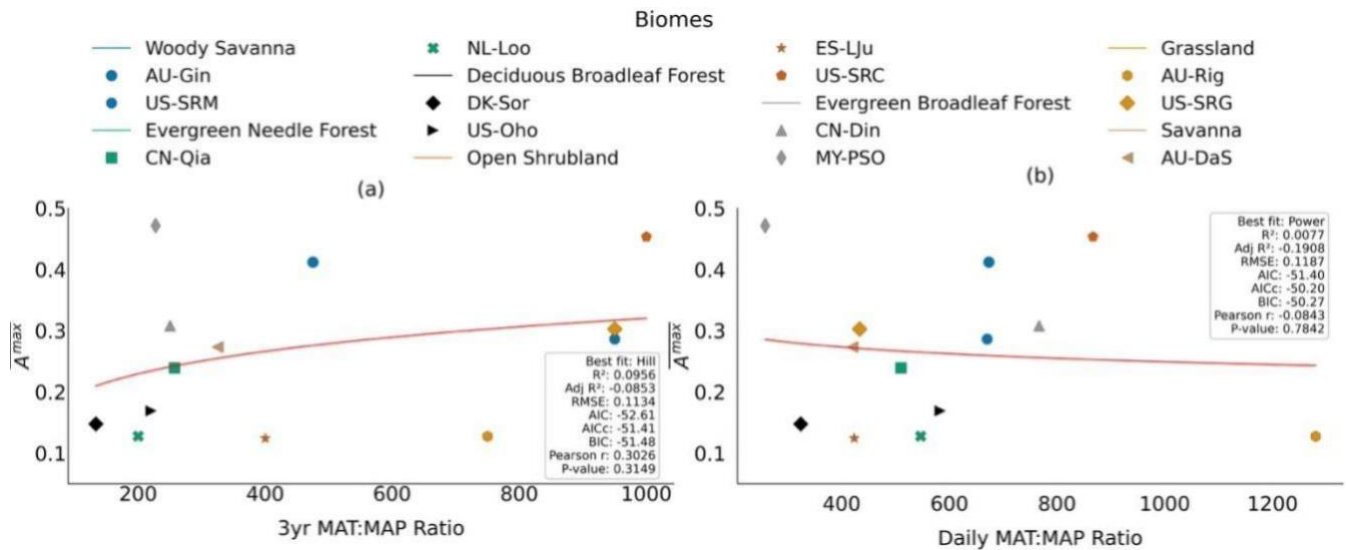

## 6. Analysis of potential drivers of asymmetry for all fluctuations

Figure S12: Relationship between average NEP asymmetry and 3yr temperature average for all fluctuations for all sites

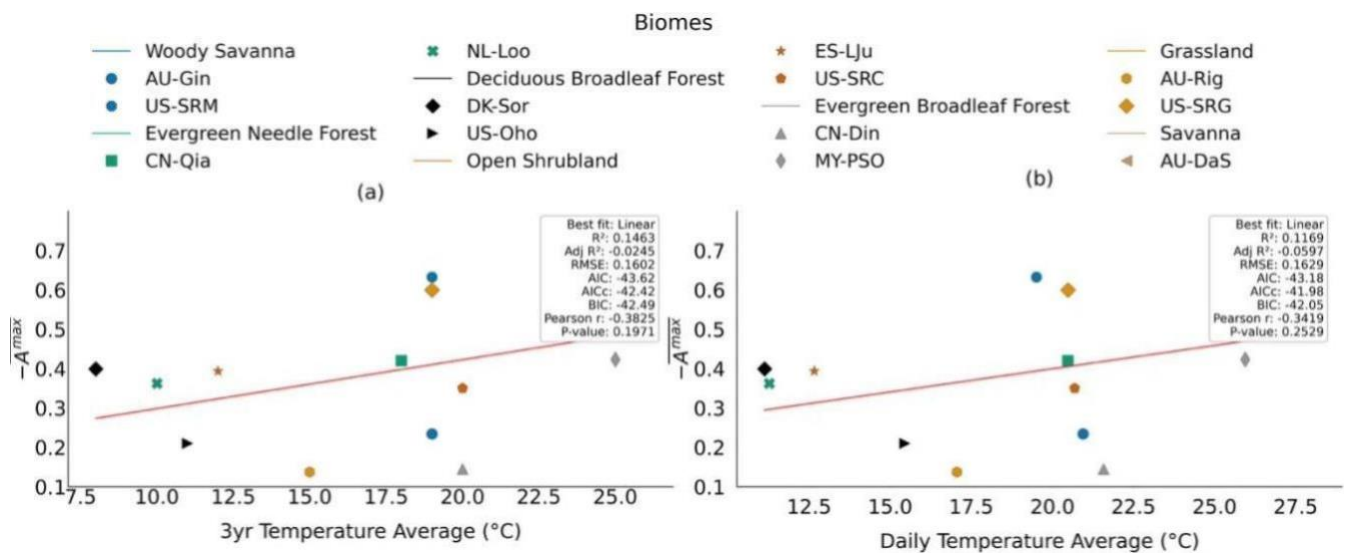

Figure S13: Relationship between average NEP asymmetry and 3yr shortwave radiation average, and daily average shortwave radiation for all fluctuations for all sites

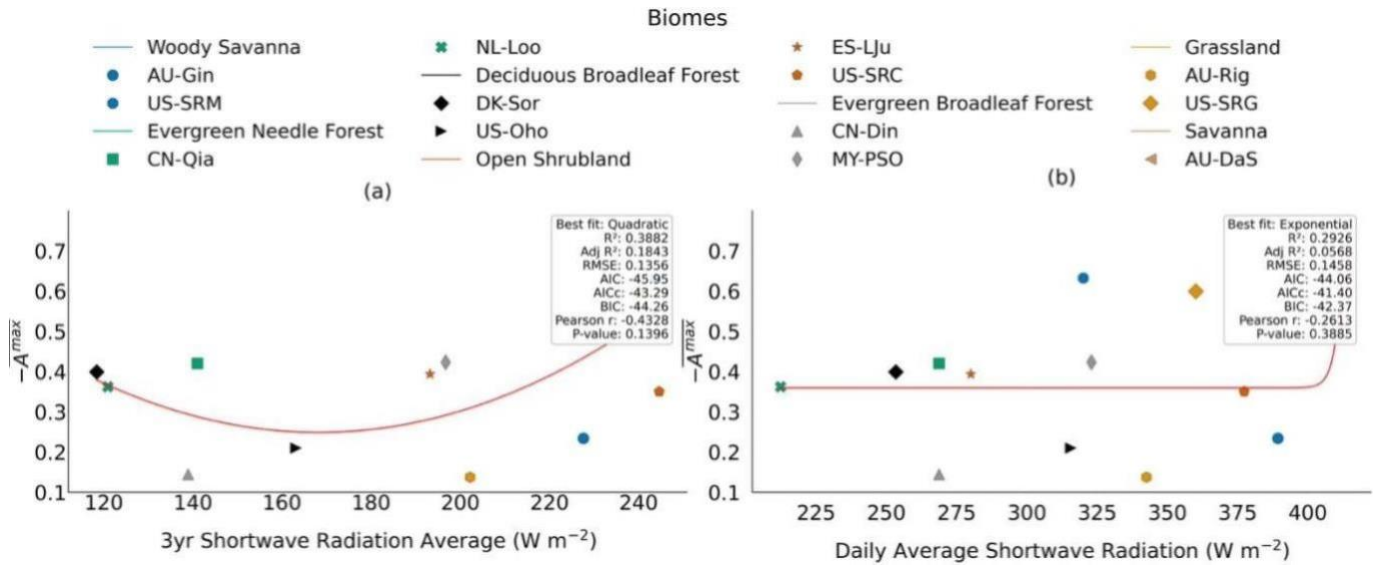

Figure S14: Relationship between average NEP asymmetry and 3yr soil moisture average, and daily average soil moisture for all fluctuations for all sites

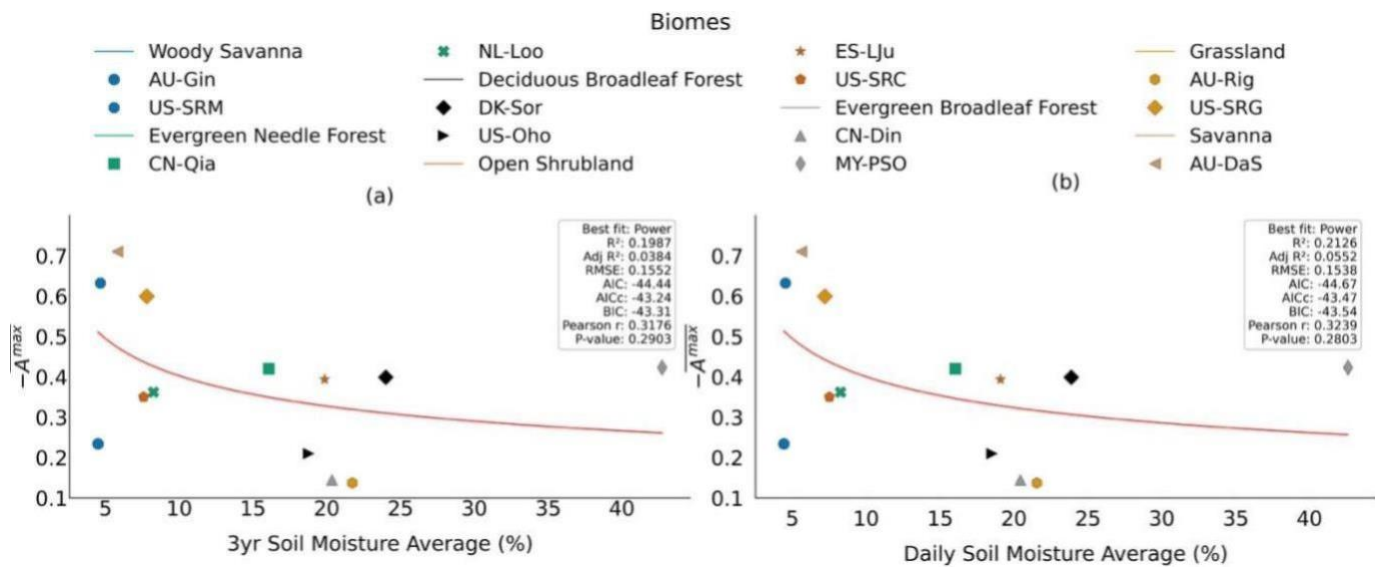

Figure S15: Relationship between average NEP asymmetry and 3yr precipitation average, and daily average precipitation for all fluctuations for all sites

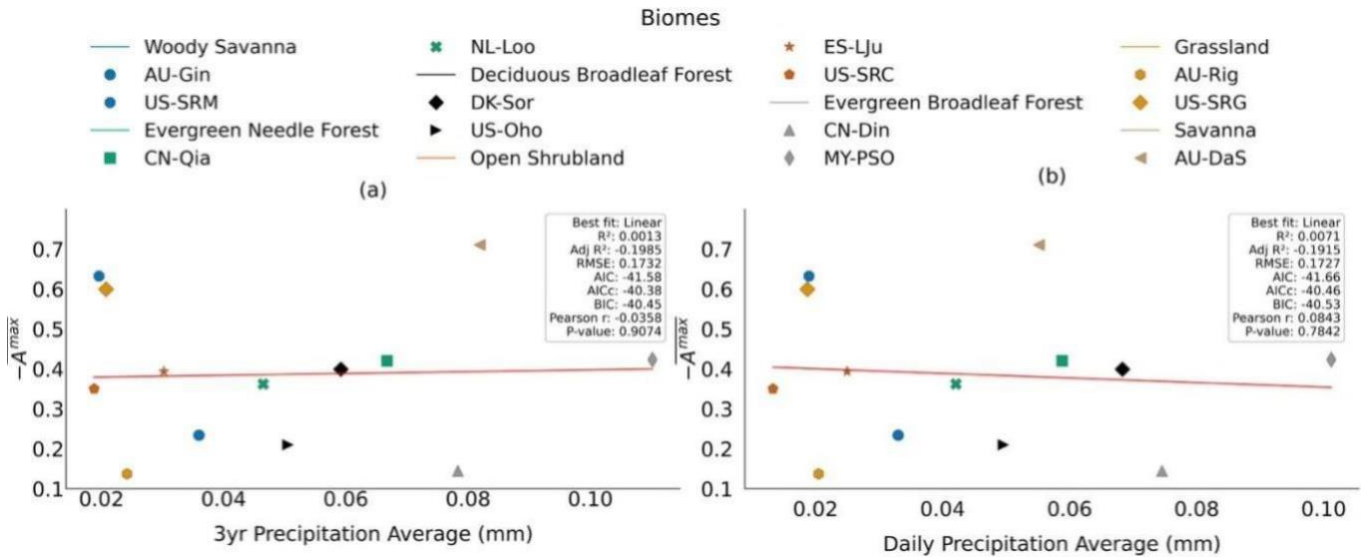

Figure S16: Relationship between average NEP asymmetry and 3yr Mean Annual Temperature: 3yr Mean Annual Precipitation and daily Mean Annual Temperature: daily Mean Annual Precipitation for all fluctuations for all sites

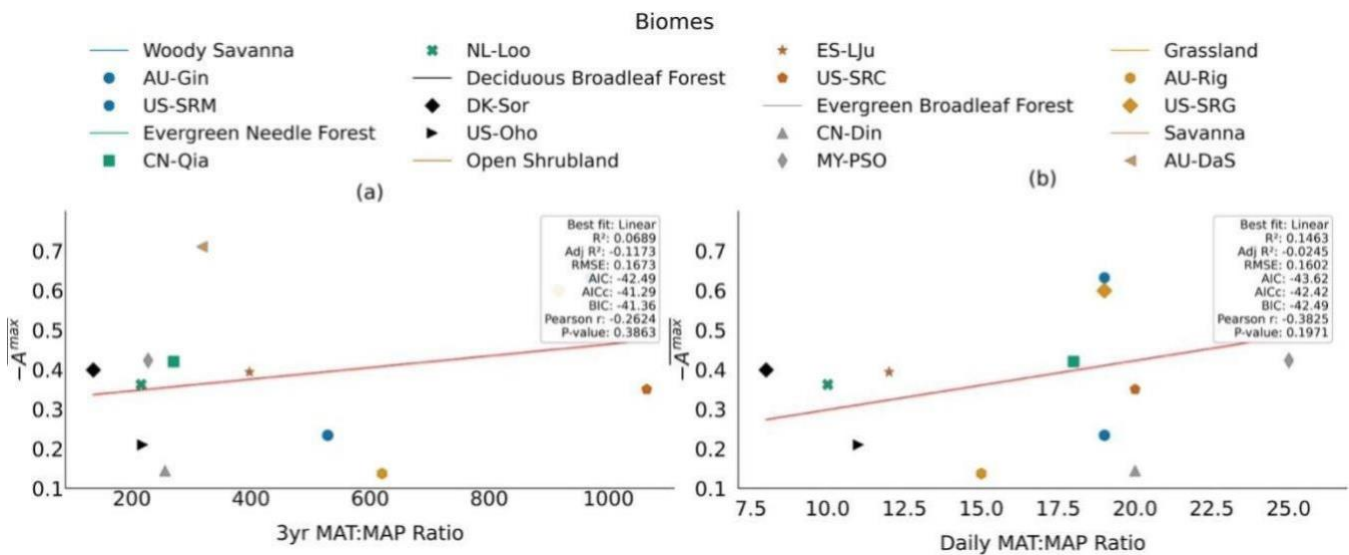

Figure S17: Relationship between average NEP asymmetry and daily average temperature for top 1% fluctuations for all sites and 3yr vapor pressure deficit average for all fluctuations for all sites

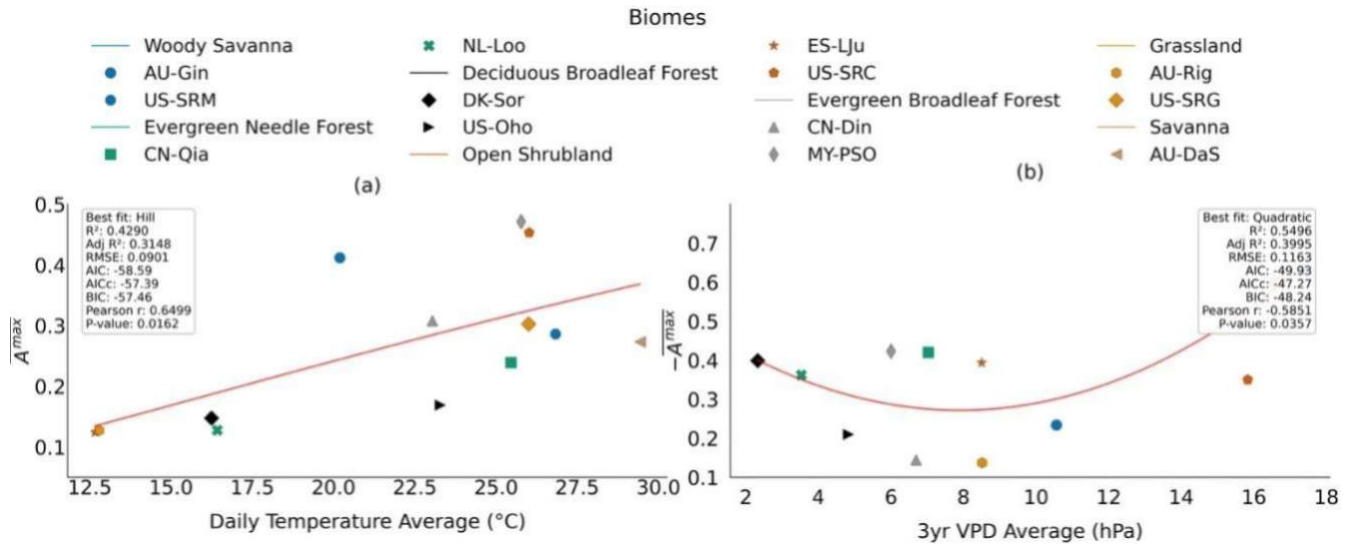

### 1. Description of selected sites

Table S1: Overview of thirteen sites key characteristics

| SITE       | LATITUDE<br>(°) | LONGITUDE<br>(°) | IGBP<br>(International<br>Geosphere–<br>Biosphere<br>Programme) | LONG<br>TERM<br>MEAN<br>ANNUAL<br>TEMP<br>(°C) | MEAN<br>ANNUAL<br>TEMP<br>FOR<br>STUDIED<br>PERIOD<br>(°C) | LONG<br>TERM<br>MEAN<br>ANNUAL<br>PRECIP.<br>(mm) | STUDIED<br>TIME<br>PERIOD<br>(years) | MEAN NEP<br>FOR<br>STUDIED<br>PERIOD<br>( $\mu\text{molCO}_2\text{m}^{-2}\text{s}^{-1}$ ) |
|------------|-----------------|------------------|-----------------------------------------------------------------|------------------------------------------------|------------------------------------------------------------|---------------------------------------------------|--------------------------------------|-------------------------------------------------------------------------------------------|
| AU-<br>Gin | -31.3764        | 115.7138         | WSA<br>(Woody<br>Savannas)                                      | 19.21                                          | 19                                                         | 641                                               | 2011-<br>2013                        | -0.614                                                                                    |
| AU-<br>DaS | -14.1593        | 131.3881         | SAV<br>(Savannas)                                               | 27.22                                          | 26.35                                                      | 975.82                                            | 2011-<br>2013                        | 0.502                                                                                     |
| CN-<br>Din | 23.1733         | 112.5361         | EBF<br>(Evergreen<br>Broadleaf<br>Forests)                      | 19.64                                          | 20.43                                                      | 1618.1                                            | 2003-<br>2005                        | 1.378                                                                                     |
| CN-<br>Qia | 26.7414         | 115.0581         | ENF<br>(Evergreen<br>Needleleaf<br>Forests)                     | 18.95                                          | 18                                                         | 1466.75                                           | 2003-<br>2005                        | 1.511                                                                                     |
| DK-<br>Sor | 55.4859         | 11.6446          | DBF<br>(Deciduous<br>Broadleaf<br>Forests)                      | 8.2                                            | 8                                                          | 660                                               | 2009-<br>2011                        | 0.742                                                                                     |
| ES-<br>LJu | 36.9266         | -2.7521          | OSH (Open<br>Shrublands)                                        | 16                                             | 12                                                         | 400                                               | 2011-<br>2013                        | 0.032                                                                                     |
| US-<br>Oho | 41.5545         | -83.8438         | DBF<br>(Deciduous<br>Broadleaf<br>Forests)                      | 10.1                                           | 11.10                                                      | 849                                               | 2011-<br>2013                        | 2.151                                                                                     |
| NL-<br>Loo | 52.1666         | 5.7436           | ENF<br>(Evergreen<br>Needleleaf<br>Forests)                     | 9.8                                            | 10                                                         | 786                                               | 2003-<br>2005                        | 1.367                                                                                     |
| MY-<br>PSO | 2.9730          | 102.3062         | EBF<br>(Evergreen<br>Broadleaf<br>Forests)                      | 25.34                                          | 25.07                                                      | 1804                                              | 2007-<br>2009                        | 2.548                                                                                     |
| US-<br>SRM | 31.8214         | -110.8661        | WSA<br>(Woody<br>Savannas)                                      | 17.92                                          | 18.90                                                      | 380                                               | 2011-<br>2013                        | 0.010                                                                                     |
| US-<br>SRC | 31.9083         | -110.8395        | OSH (Open<br>Shrublands)                                        | 22                                             | 19.62                                                      | 330                                               | 2008-<br>2010                        | 0.138                                                                                     |
| AU-<br>Rig | -36.6499        | 145.5759         | GRA<br>(Grasslands)                                             | 15.57                                          | 15.41                                                      | 650                                               | 2011-<br>2013                        | 0.326                                                                                     |
| US-<br>SRG | 31.7894         | -110.8277        | GRA<br>(Grasslands)                                             | 17                                             | 18.67                                                      | 420                                               | 2012-<br>2014                        | 0.080                                                                                     |

Table S2: Overview of FLUXNET variables used in this study

| VARIABLE                             | FLUXNET CODE    | DESCRIPTION                                                                                   |
|--------------------------------------|-----------------|-----------------------------------------------------------------------------------------------|
| Net Ecosystem Exchange               | NEE_VUT_REF     | Net CO <sub>2</sub> exchange derived using Variable USTAR Threshold method                    |
| Air Temperature                      | TA_F            | Air temperature consolidated from TA_F_MDS and TA_ERA                                         |
| Incoming Shortwave Radiation         | SW_IN_F         | Shortwave radiation consolidated from SW_IN_F_MDS and SW_IN_ERA (negative values set to zero) |
| Vapor Pressure Deficit               | VPD_F           | Vapor Pressure Deficit consolidated from VPD_F_MDS and VPD_ERA                                |
| Precipitation                        | P_F             | Precipitation consolidated from P and P_ERA                                                   |
| Soil Water Content                   | SWC_F_MDS_1     | Gap-filled soil water content using MDS method                                                |
| Ecosystem Respiration (nighttime)    | RECO_NT_VUT_REF | Ecosystem respiration from nighttime partitioning method using VUT filtering                  |
| Ecosystem Respiration (daytime)      | RECO_DT_VUT_REF | Ecosystem respiration from daytime partitioning method using VUT filtering                    |
| Gross Primary Production (nighttime) | GPP_NT_VUT_REF  | GPP from nighttime partitioning method using VUT filtering                                    |
| Gross Primary Production (daytime)   | GPP_DT_VUT_REF  | GPP from daytime partitioning method using VUT filtering                                      |
| Timestamp                            | TIMESTAMP_END   | ISO timestamp end of averaging period (YYYYMMDDHHMM format)                                   |

## 2. Description of key variables and calculations for NEP Asymmetry Analysis

Table S3: Overview of key variables for NEP asymmetry analysis

| SYMBOL                          | VARIABLE DEFINITION                                                                                                                                                                                 |
|---------------------------------|-----------------------------------------------------------------------------------------------------------------------------------------------------------------------------------------------------|
| NEP                             | Net Ecosystem Productivity (NEP), i.e., the negative of Net Ecosystem Exchange (NEE).                                                                                                               |
| NEP <sup>max</sup>              | The maximum NEP value (peak value) for a large fluctuation.                                                                                                                                         |
| t <sub>p</sub>                  | Time at which the peak NEP value, NEP <sup>max</sup> , occurs.                                                                                                                                      |
| NEP <sup>FP</sup> <sub>t</sub>  | Falling limb of the fluctuation path: Portion of NEP starting at peak time and continuing for 6 hours after the peak, representing how NEP decreases as the system returns towards its equilibrium. |
| NEP <sup>FP</sup> <sub>-t</sub> | Rising limb of the fluctuation path: Portion of NEP starting 6 hours before the peak and ending at peak time, showing how NEP increases as it approaches NEP <sup>max</sup> .                       |
| A <sub>t</sub>                  | Asymmetry coefficient at time t, measuring the difference between falling and rising limbs.                                                                                                         |
| A <sub>t</sub>                  | The average asymmetry coefficient across all fluctuation paths.                                                                                                                                     |
| A <sup>max</sup>                | Maximum value of asymmetry coefficient which is the peak value A <sub>t</sub> across time t.                                                                                                        |
| τ                               | Half-width of the time window around t <sub>p</sub> , defining the length of the fluctuation path.                                                                                                  |
| σ                               | Standard deviation of NEP over the considered 3 yr period.                                                                                                                                          |
| c                               | Coefficient that is used to calculate and set the threshold for identifying fluctuations, with a chosen quantile percentage (e.g., top 1% fluctuations).                                            |
| μ                               | Mean of NEP over the considered 3 yr period.                                                                                                                                                        |

Table S4: Overview of steps and formulas for NEP asymmetry analysis

| STEP                                                                                                         | FORMULA                                           |
|--------------------------------------------------------------------------------------------------------------|---------------------------------------------------|
| <b>1. Threshold Calculation</b>                                                                              |                                                   |
| 1.1 Set the threshold to identify large fluctuations.                                                        | $NEP^{\text{threshold}} = \mu + c\sigma$          |
| <b>2. Fluctuation Path Identification</b>                                                                    |                                                   |
| 2.1 Identify the peak of each fluctuation that exceeds the threshold, and mark the peak time $t_p$ .         | $NEP^{\text{max}} = \max (NEP)$                   |
| 2.2 Define the fluctuation path around each peak with a time window of width $2\tau$ centered around $t_p$ . | $[t_p - \tau, t_p + \tau]$ , where $\tau = 6$ hrs |
| 2.3 Normalize each fluctuation path by its peak NEP value.                                                   | $NEP_t^{\text{RP}} = NEP_t / NEP_t^{\text{max}}$  |
| <b>3. Asymmetry Coefficient Calculation</b>                                                                  |                                                   |
| 3.1 Calculate the difference between falling and rising limbs.                                               | $A_t = NEP_t^{\text{RP}} - NEP_{-t}^{\text{RP}}$  |
| 3.2 Calculate the average asymmetry across all fluctuation paths to quantify time asymmetry.                 | $A_t = 1/N \sum_{i=1}^N A_t^i$                    |
| <b>4. Peak Asymmetry Calculation</b>                                                                         |                                                   |
| 4.1 Calculate the maximum value of asymmetry coefficient for each fluctuation path.                          | $A^{\text{max}} = \max (A_t)$                     |

**3. Details of quality control analysis of top 1% extreme fluctuations across all sites**

*Table S5: Overview of the total number of identified extremes per site, with the count and percentage of those extremes (top1% peaks) that correspond to gap-filled data ( $NEE\_VUT\_REF\_QC > 0$ ).*

| SITE         | TOTAL EXTREMES | GAP-FILLED EXTREMES | PERCENT GAP-FILLED (%) | SHARE OF TOTAL GAP-FILLED DATA (%) |
|--------------|----------------|---------------------|------------------------|------------------------------------|
| AU-DaS       | 211            | 27                  | 12.80                  | 8.5                                |
| AU-Gin       | 212            | 14                  | 6.60                   | 4.4                                |
| AU-Rig       | 99             | 40                  | 40.40                  | 12.5                               |
| CN-Din       | 298            | 49                  | 16.44                  | 15.4                               |
| CN-Qia       | 274            | 13                  | 4.74                   | 4.1                                |
| DK-Sor       | 189            | 7                   | 3.70                   | 2.2                                |
| ES-LJu       | 131            | 3                   | 2.29                   | 0.9                                |
| MY-PSO       | 378            | 10                  | 2.65                   | 3.1                                |
| NL-Loo       | 262            | 51                  | 19.47                  | 16.0                               |
| US-Oho       | 194            | 39                  | 20.10                  | 12.2                               |
| US-SRC       | 114            | 23                  | 20.18                  | 7.2                                |
| US-SRG       | 85             | 5                   | 5.88                   | 1.66                               |
| US-SRM       | 124            | 38                  | 30.65                  | 11.9                               |
| <b>TOTAL</b> | <b>2571</b>    | <b>319</b>          | <b>12.41</b>           | <b>100.0</b>                       |

**4. Details of statistical metrics for best fit model selection for all environmental drivers**

*Table S6: Overview of best fit relationships for all variables for top 1% fluctuations*

| ENVIRONMENTAL DRIVER         | R <sup>2</sup> | ADJUSTED R <sup>2</sup> | ROOT MEAN SQUARED ERROR (RMSE) | AKAIKE INFORMATION CRITERION (AIC) | CORRECTED AIC (AICc) | BAYESIAN INFORMATION CRITERION (BIC) | PEARSON CORRELATION COEFFICIENT (r) | P-Value | BEST FIT  |
|------------------------------|----------------|-------------------------|--------------------------------|------------------------------------|----------------------|--------------------------------------|-------------------------------------|---------|-----------|
| 3yr Temperature              | 0.5908         | 0.5089                  | 0.0762                         | -62.92                             | -61.72               | -61.79                               | 0.7535                              | 0.0029  | Hill      |
| 3yr Shortwave Radiation      | 0.2801         | 0.1361                  | 0.1011                         | -55.57                             | -54.37               | -54.44                               | 0.5292                              | 0.0629  | Linear    |
| 3yr Precipitation            | 0.4245         | 0.2327                  | 0.0904                         | -56.49                             | -53.82               | -54.79                               | 0.2228                              | 0.4644  | Quadratic |
| 3yr Soil Moisture            | 0.5365         | 0.3280                  | 0.0811                         | -59.30                             | -56.63               | -57.60                               | 0.0201                              | 0.9480  | Quadratic |
| 3yr Vapor Pressure Deficit   | 0.2203         | 0.0644                  | 0.1053                         | -54.54                             | -53.34               | -53.41                               | 0.4417                              | 0.1308  | Hill      |
| 3yr MAT: 3yr MAP             | 0.0956         | -0.0853                 | 0.1134                         | -52.61                             | -51.41               | -51.48                               | 0.3026                              | 0.3149  | Hill      |
| Daily Temperature            | 0.4484         | 0.3380                  | 0.0885                         | -59.03                             | -57.83               | -57.90                               | 0.6499                              | 0.0162  | Hill      |
| Daily Shortwave Radiation    | 0.3319         | 0.1092                  | 0.0974                         | -54.54                             | -51.88               | -52.85                               | 0.4066                              | 0.1680  | Quadratic |
| Daily Precipitation          | 0.2200         | 0.0640                  | 0.1053                         | -54.53                             | -53.33               | -53.40                               | 0.4690                              | 0.1059  | Linear    |
| Daily Soil Moisture          | 0.4194         | 0.2258                  | 0.0908                         | -56.37                             | -53.70               | -54.67                               | 0.0357                              | 0.9077  | Quadratic |
| Daily Vapor Pressure Deficit | 0.2690         | 0.1228                  | 0.1019                         | -55.38                             | -54.18               | -54.25                               | 0.4851                              | 0.0929  | Hill      |
| Daily MAT: Daily MAP         | 0.5873         | 0.3809                  | 0.0766                         | -58.81                             | -53.81               | -56.55                               | -0.0843                             | 0.7842  | Cubic     |

Table S7: Overview of best fit relationships for all variables for all fluctuations

| ENVIRONMENTAL DRIVER         | R <sup>2</sup> | ADJUSTED R <sup>2</sup> | ROOT MEAN SQUARED ERROR (RMSE) | AKAIKE INFORMATION CRITERION (AIC) | CORRECTED AIC (AICc) | BAYESIAN INFORMATION CRITERION (BIC) | PEARSON CORRELATION COEFFICIENT (r) | P-Value | BEST FIT    |
|------------------------------|----------------|-------------------------|--------------------------------|------------------------------------|----------------------|--------------------------------------|-------------------------------------|---------|-------------|
| 3yr Temperature              | 0.1463         | -0.0245                 | 0.1602                         | -43.62                             | -42.42               | -42.49                               | -0.3825                             | 0.1971  | Linear      |
| 3yr Shortwave Radiation      | 0.3382         | 0.1843                  | 0.1356                         | -45.95                             | -43.29               | -44.26                               | -0.4328                             | 0.1396  | Quadratic   |
| 3yr Precipitation            | 0.0013         | -0.1985                 | 0.1732                         | -41.58                             | -40.38               | -40.45                               | -0.0358                             | 0.9074  | Linear      |
| 3yr Soil Moisture            | 0.1987         | 0.0384                  | 0.1552                         | -44.44                             | -43.24               | -43.31                               | 0.3176                              | 0.2903  | Power       |
| 3yr Vapor Pressure Deficit   | 0.5496         | 0.3995                  | 0.1163                         | -49.93                             | -47.27               | -48.24                               | -0.5851                             | 0.0357  | Quadratic   |
| 3yr MAT: 3yr MAP             | 0.0689         | -0.1173                 | 0.1673                         | -42.49                             | -41.29               | -41.36                               | -0.2624                             | 0.3863  | Linear      |
| Daily Temperature            | 0.1169         | -0.0597                 | 0.1629                         | -43.18                             | -41.98               | -42.05                               | -0.3419                             | 0.2529  | Linear      |
| Daily Shortwave Radiation    | 0.2926         | 0.0568                  | 0.1458                         | -44.06                             | -41.40               | -42.37                               | -0.2613                             | 0.3885  | Exponential |
| Daily Precipitation          | 0.0071         | -0.1915                 | 0.1727                         | -41.66                             | -40.46               | -40.53                               | 0.0843                              | 0.7842  | Linear      |
| Daily Soil Moisture          | 0.2126         | 0.0552                  | 0.1538                         | -44.67                             | -43.47               | -43.54                               | 0.3239                              | 0.2803  | Power       |
| Daily Vapor Pressure Deficit | 0.6352         | 0.5136                  | 0.1047                         | -52.68                             | -50.01               | -50.98                               | -0.5880                             | 0.0345  | Quadratic   |
| Daily MAT: Daily MAP         | 0.0501         | -0.1399                 | 0.1689                         | -42.23                             | -41.03               | -41.10                               | -0.2111                             | 0.4888  | Power       |
